# Essential Titles for Mental Health Professionals

## Clinical Manual of Palliative Care Psychiatry

Nathan Fairman, M.D., M.P.H., Jeremy M. Hirst, M.D., and  
Scott A. Irwin, M.D., Ph.D.

Psychiatrists and residents are faced with the task of refreshing their In recent years, palliative care has emerged as the leading model of person-centered care focused on preserving quality of life and alleviating distress for people and families experiencing serious and life-limiting medical illness. Alongside this development has come a growing recognition of the need for expertise in psychiatric diagnosis, psychopharmacology, and psychotherapy within the interdisciplinary team of specialists tasked with identifying and addressing the varied sources of suffering in patients with advanced medical illnesses. The *Clinical Manual of Palliative Care Psychiatry* was written to motivate and guide readers—whether mental health clinicians or palliative care providers—to deepen their understanding of the psychosocial dimensions of suffering for the benefit of seriously ill patients and the support of their families.

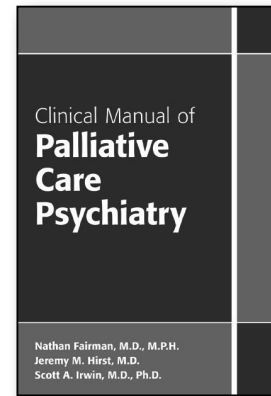

2016 • 304 pages • ISBN 978-1-58562-476-8 • Paperback • \$61.00 • Item #62476

2016 • 304 pages • ISBN 978-1-61537-061-0 • eBook • \$48.95 • Item #37061

## People With Mental Illness in the Criminal Justice System

Answering a Cry for Help

Group for the Advancement of Psychiatry  
Committee on Psychiatry and the Community

Written by a committee of the Group for the Advancement of Psychiatry, *People With Mental Illness in the Criminal Justice System: Answering A Cry for Help* represents the collective wisdom of leaders in community psychiatry and is the third in a series of successful publications that have used Dear Abby letters as source material. The letters, submitted by readers with experience with mental illness and the criminal justice system, constitute a rich, real-world repository for the case stories presented in this fascinating volume. Using the experiences shared in the letters, the authors employ the Sequential Intercept Model to present a series of chapters offering detailed recommendations for psychiatrists, group practices, and criminal justice entities on partnering with individuals who are at risk and their families, with the goal of improving outcomes.

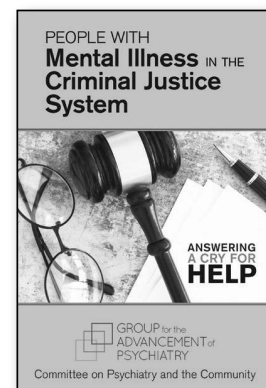

This book can potentially reduce the overrepresentation of people with mental illnesses in justice settings, provide alternatives to incarceration, and divert individuals who do not pose a public safety risk from jail.

2016 • 175 pages • ISBN 978-0-87318-219-5 • Paperback • \$31.50 • Item #7219

2016 • 175 pages • ISBN 978-0-87318-220-1 • eBook • \$25.00 • Item #7220

AMERICAN  
PSYCHIATRIC  
ASSOCIATION  
PUBLISHING

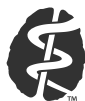

[www.appi.org](http://www.appi.org)

Email: [appi@psych.org](mailto:appi@psych.org)

Toll Free: 1-800-368-5777

20% Discount for American Psychiatric Association Members

25% Discount for APA Resident-Fellow Members

Please use Priority Code AH1711A when ordering.

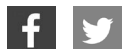

**Psychiatric Services** (ISSN 1075-2730; online version, 1557-9700) is published monthly by the American Psychiatric Association, editorial and executive office, 1000 Wilson Blvd., Suite 1825, Arlington, VA 22209-3901. Copyright © 2016 by the American Psychiatric Association. Printed in U.S.A. Periodicals postage paid at Arlington, VA, and at additional mailing offices. POSTMASTER: Send address changes to **Psychiatric Services**, 1000 Wilson Blvd., Suite 1825, Arlington, VA 22209-3901.



“Correctional Health Services provides an excellent foundation to build your career. You have a lot of freedom to set your own parameters. We have a large supportive team and we bounce ideas off each other.”  
**Joseph Simpson, M.D.**  
 Supervising Psychiatrist,  
 Correction Health Services

## UNLIMITED GROWTH OPPORTUNITIES

Los Angeles County has immediate openings with Antelope Valley, Correctional Health Services, Juvenile Halls and Probation Camps, and directly operated programs. This is your chance to join one of the nation’s leading mental health agencies and work in a safe, diverse, and challenging environment. The County is filled with opportunities for professional development and growth, including new full-time and part-time psychiatrist positions.

**LAC DMH**  
 LOS ANGELES COUNTY MENTAL HEALTH

[www.psychiatristjobs.la](http://www.psychiatristjobs.la)

- ✓ Competitive starting salaries and benefits
- ✓ Potential Bonuses up to \$30,000\* a year
- ✓ Up to 24 hours /wk for outside employment

\*Depending on qualifications and placement.

“What attracted me to this opportunity was the flexibility to practice in so many settings. If you want a change in treatment settings or a change of patient population, you can do that all within the same employer, and that employer is DMH.”  
**Marcia Mshewa, M.D.**  
 Psychiatrist, Correctional Health Services

## FREE Online Subscription to *Psychiatric Services* for APA Resident-Fellow Members (RFMs)!

American Psychiatric Association Resident-Fellow Members (RFMs) can receive a free online subscription to *Psychiatric Services*.

Simply visit [ps.psychiatryonline.org](http://ps.psychiatryonline.org) for full-text access to all of the content of APA’s highly ranked, peer-reviewed monthly journal. *Psychiatric Services* focuses on service delivery in organized systems of care, evolving best practices, and federal and state policies that affect the care of people with mental illnesses.

Please visit [ps.psychiatryonline.org](http://ps.psychiatryonline.org) and log in with your American Psychiatric Association username and password.

Psychiatry residents who are not currently APA Resident-Fellow Members should consider membership in the American Psychiatric Association. The benefits provided to residents are an example of how the APA serves the needs of its members throughout their careers. The low introductory dues APA extends to RFMs are even waived for the first year. Please visit [www.psychiatry.org/join-apa](http://www.psychiatry.org/join-apa) for more information.

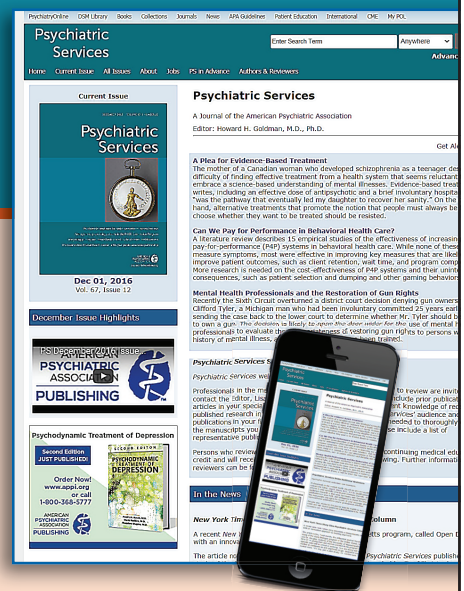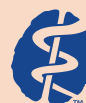

# psychiatryonline.org

Your Destination for Lifelong Learning in Psychiatry

Your one-stop resource for information on diagnosis, treatment, guidelines, the latest research, and breaking news from the field.

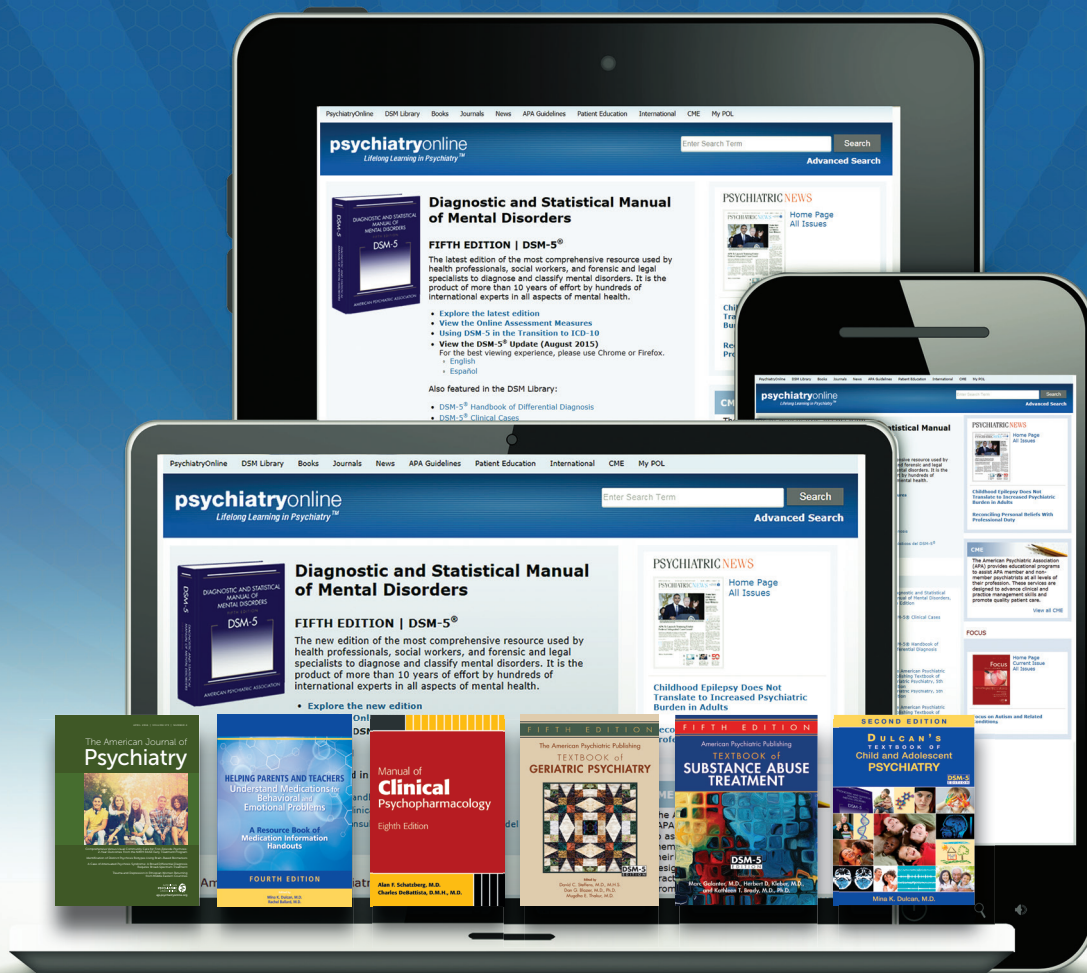

Subscribe to products individually or to the DSM Select package that includes the DSM-5® library, books and select journals.

Go to [www.appi.org](http://www.appi.org) to subscribe.

Institutional subscription options are available.

For more information contact: [institutions@psych.org](mailto:institutions@psych.org); 800-368-5777 ext. 7874

AMERICAN  
PSYCHIATRIC  
ASSOCIATION  
PUBLISHING

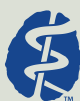

[www.appi.org](http://www.appi.org) • 1-800-368-5777 • [appi@psych.org](mailto:appi@psych.org)

AH1703A
