# Psychiatric Services

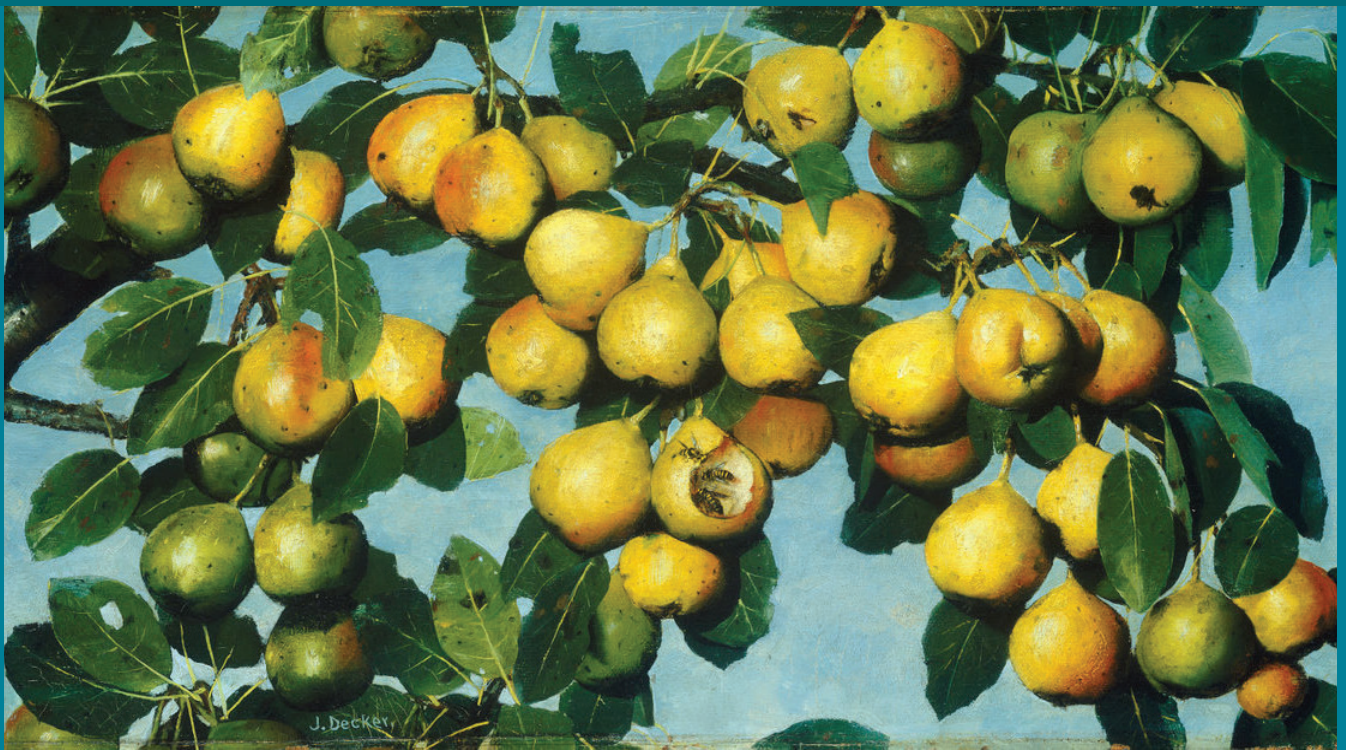

ACA impact on coverage of behavioral health conditions

A close look at on- and off-label prescribing practices

Regional and racial differences in hospitalization length and cost

Direct-to-consumer marketing of evidence-based psychosocial treatments
